# Supplementary material for: VASH1–SVBP and VASH2–SVBP generate different detyrosination profiles on microtubules
Source: PubMed Central journal article supplement — J Cell Biol. 2022 Dec 13;222(2):e202205096. doi: 10.1083/jcb.202205096 (PMC9750192; doi:10.1083/jcb.202205096), 2022-12-13

## eGFP

|       |   |   | mutants |   |   |   |
|-------|---|---|---------|---|---|---|
| VASH2 | - | - | WT      | 1 | 2 | 3 |
| SVBP  | - | + | +       | + | + | + |

75 kDa—

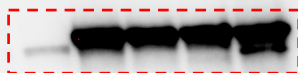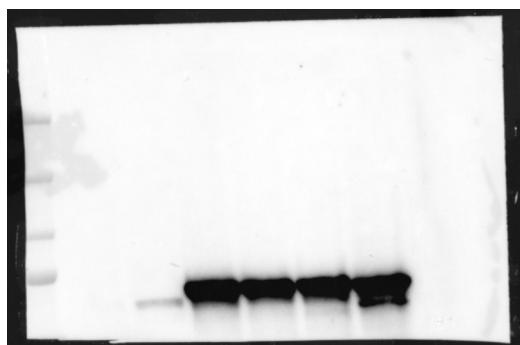

## GAPDH

|       |   |   | mutants |   |   |   |
|-------|---|---|---------|---|---|---|
| VASH2 | - | - | WT      | 1 | 2 | 3 |
| SVBP  | - | + | +       | + | + | + |

37 kDa—

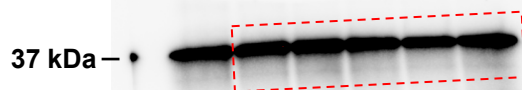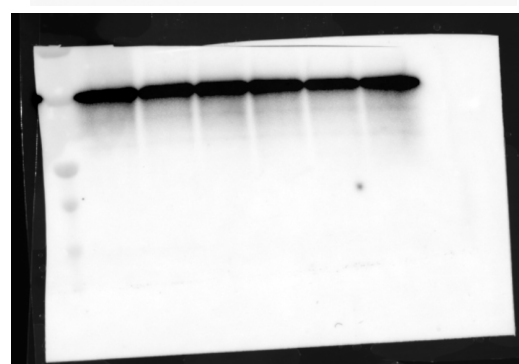

## deTyr-tub

|       |   |   | mutants |   |   |   |
|-------|---|---|---------|---|---|---|
| VASH2 | - | - | WT      | 1 | 2 | 3 |
| SVBP  | - | + | +       | + | + | + |

50 kDa—

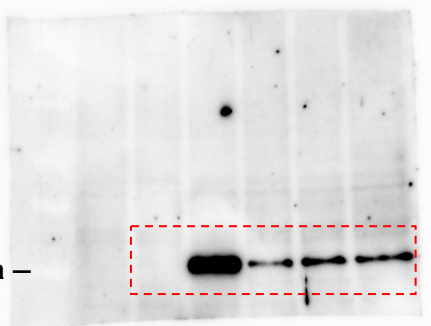

## FLAG

|       |   |   | mutants |   |   |   |
|-------|---|---|---------|---|---|---|
| VASH2 | - | - | WT      | 1 | 2 | 3 |
| SVBP  | - | + | +       | + | + | + |

15 kDa—

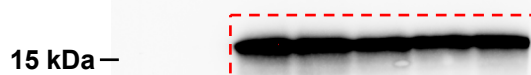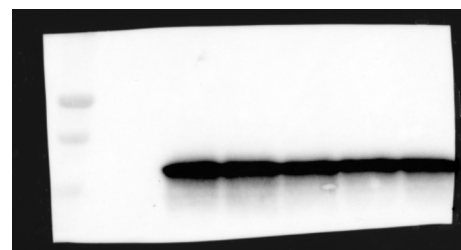

Supplement: JCB_202205096_SourceDataF3.pdf [file JCB_202205096_SourceDataF3.pdf]
