# Supplementary material for: VASH1–SVBP and VASH2–SVBP generate different detyrosination profiles on microtubules
Source: PubMed Central journal article supplement — J Cell Biol. 2022 Dec 13;222(2):e202205096. doi: 10.1083/jcb.202205096 (PMC9750192; doi:10.1083/jcb.202205096), 2022-12-13

Coomassie blue  
(gel image)

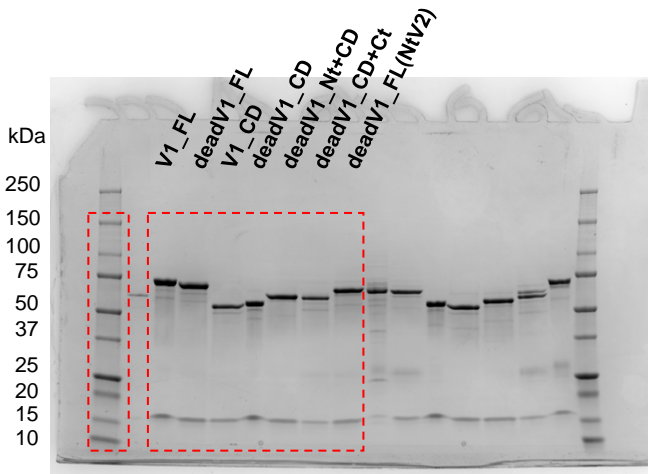

anti-VASH1

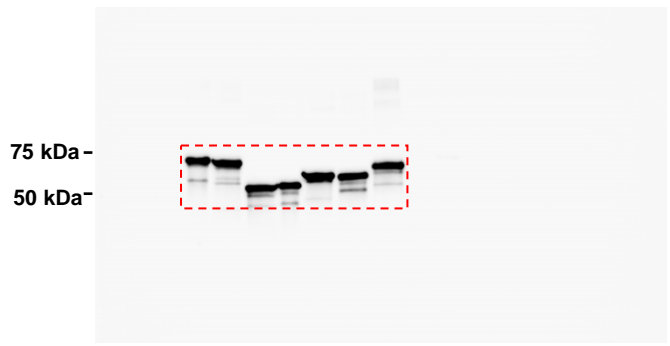

anti-GFP

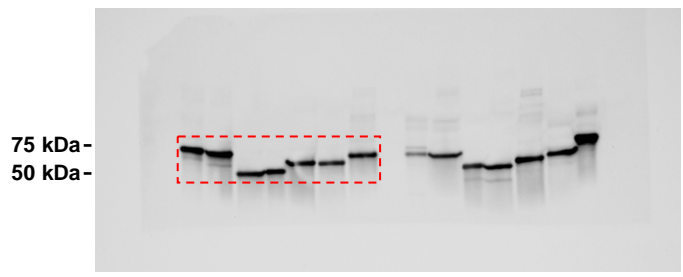

anti-His

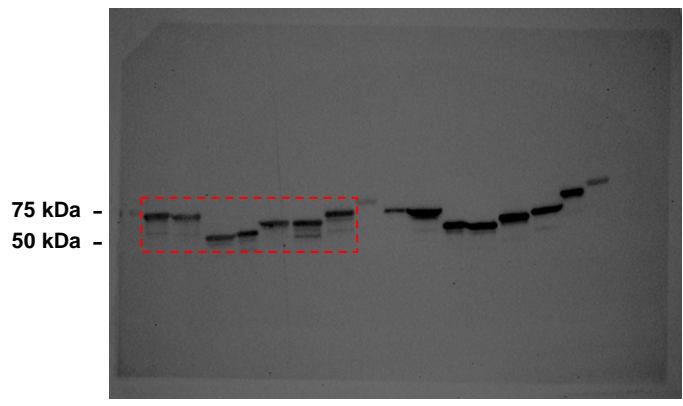

anti-SVBP

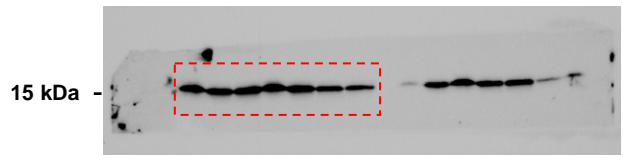

### anti- $\alpha$ tot tubulin

HEK 293T  
+ mCherry Brain HeLa

Tyr deTyr  $\Delta 2$  1 2 3 Tyr deTyr

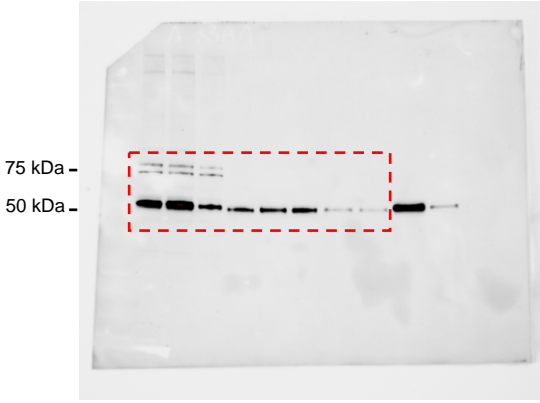

### anti- $\alpha$ deTyr tubulin

HEK 293T  
+ mCherry Brain HeLa

deTyr 1 2 3 Tyr deTyr

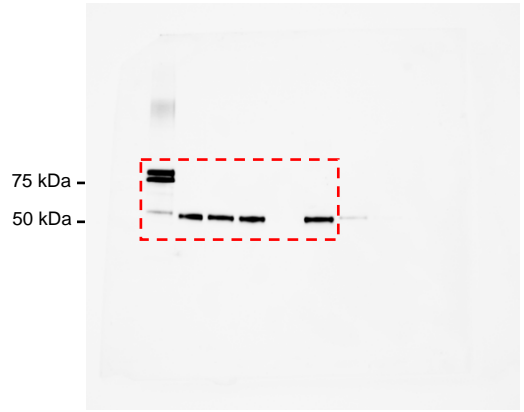

### anti- $\alpha$ Tyr tubulin

HEK 293T  
+ mCherry Brain HeLa

Tyr 1 2 3 Tyr deTyr

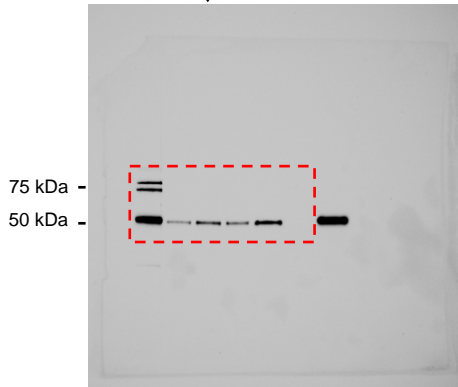

### anti- $\alpha$ $\Delta 2$ tubulin

HEK 293T  
+ mCherry Brain HeLa

$\Delta 2$  1 2 3 Tyr deTyr

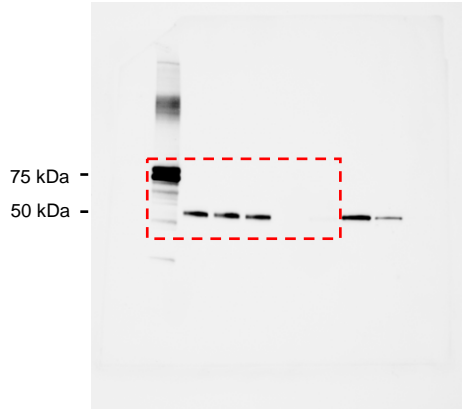

Supplement: JCB_202205096_SourceDataFS1.pdf [file JCB_202205096_SourceDataFS1.pdf]
